# Supplementary material for: In Vitro Effects of Methylprednisolone over Oligodendroglial Cells: Foresight to Future Cell Therapies
Source: MDPI journal article supplement (doi:10.3390/cells12111515), 2023-05-30
Supplement: s1 [file s1]

Table S1

*Reagents and materials used in cell culture*

| <i>Reagent/Material</i>     | <i>Commercial Company</i> | <i>Reference</i> |
|-----------------------------|---------------------------|------------------|
| Methylprednisolone          | Sigma-Aldrich             | M1750000         |
| PBS                         | Gibco                     | 10270-106        |
| TrypLETM express            | Gibco                     | 12604-013        |
| DMEM                        | Gibco                     | 11320-074        |
| FBS                         | Gibco                     | 10270-106        |
| Flask T25                   | Eppendorf                 | 0030 710.126     |
| Falcon 15ml centrifuge tube | Thermo Fisher Scientific  | 339650           |
| 5 and 10 ml pipettes        | Fisherbrand               | 13-676-10J       |
| trypan blue                 | Sigma-Aldrich             | 72-57-1          |

Golli-MBP isoform 2

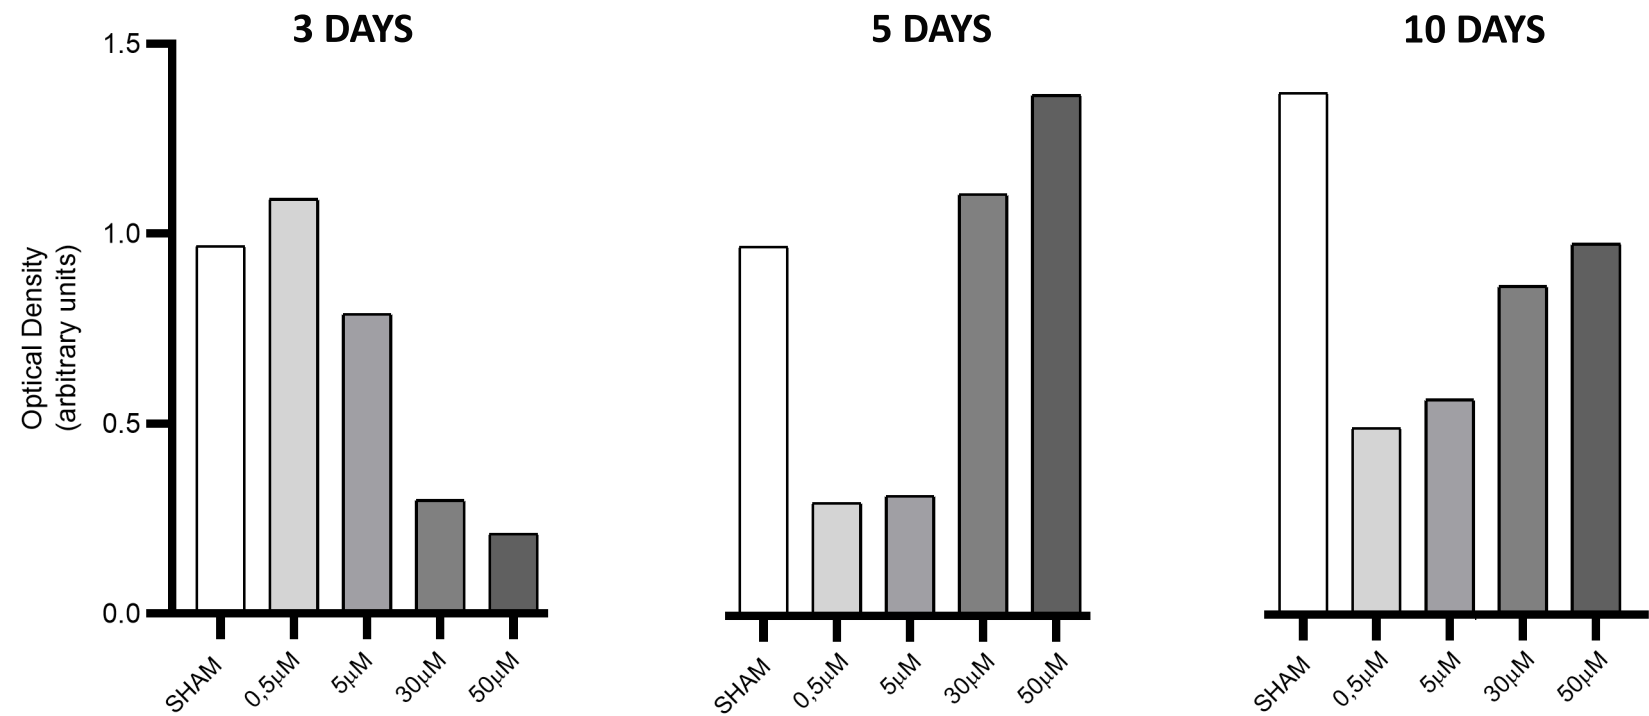

MBP Isoform 4-14

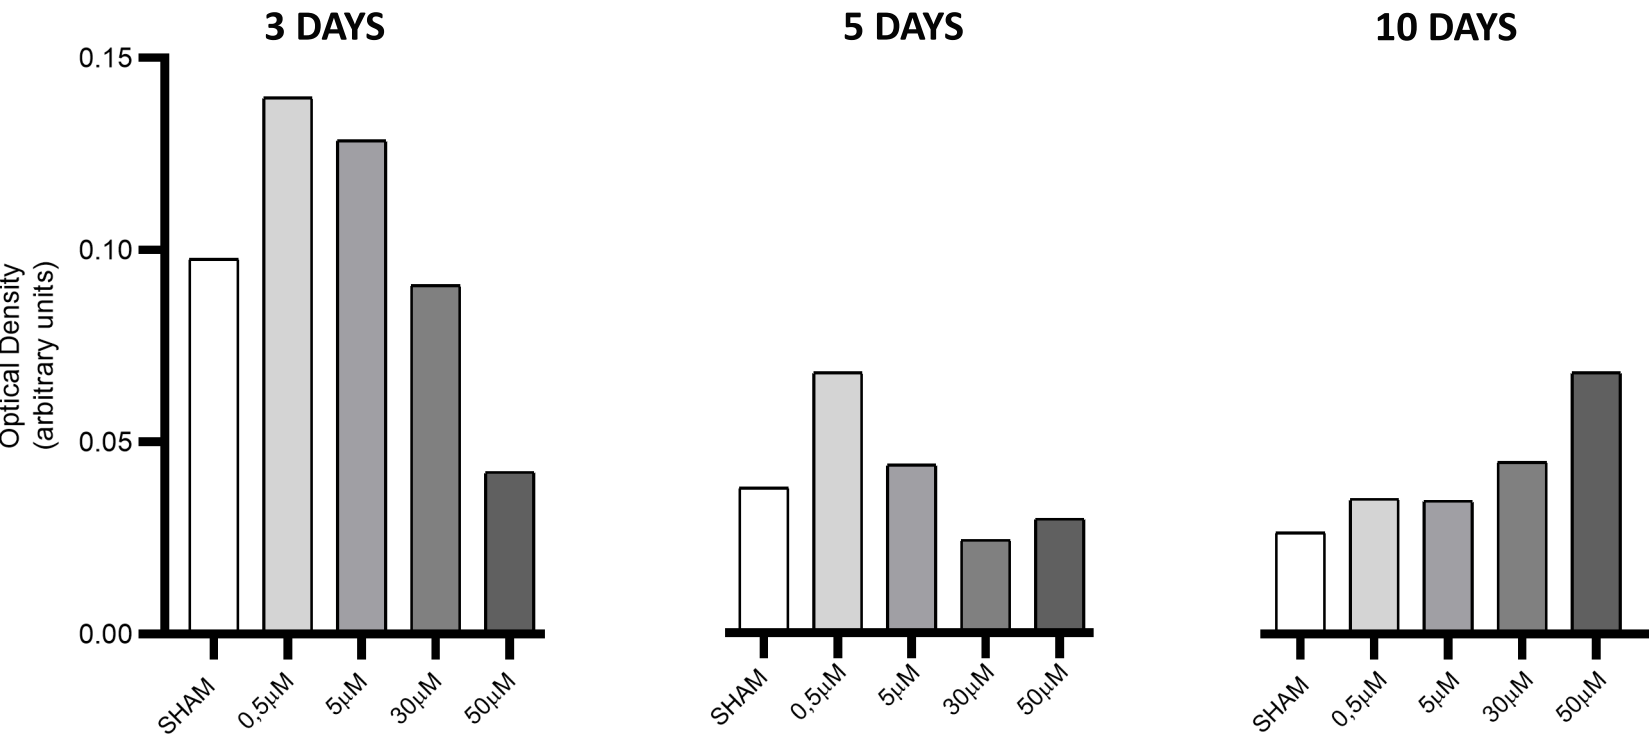

Supplementary Figure S2

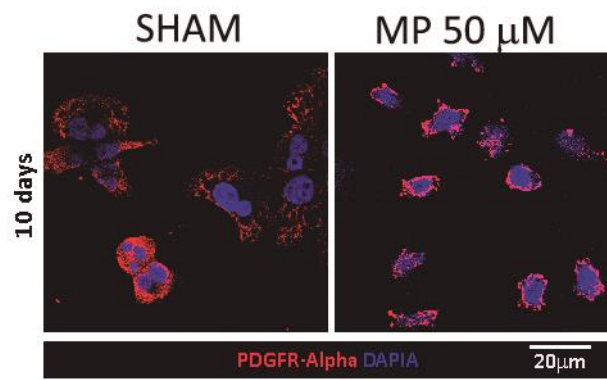

Example of image shows that the specific markers of oligodendroglial progenitors are maintained after corticosteroid administration (10 days), but with a different pattern.
